# Quantifying the impact of dengue containment activities using high-resolution observational data

Nabeel Abdur Rehman<sup>a</sup>, Henrik Salje<sup>b</sup>, Moritz U G Kraemer<sup>c</sup>,  
Lakshminarayanan Subramanian<sup>a</sup>, Simon Cauchemez<sup>b</sup>, Umar Saif<sup>d</sup>, Rumi  
Chunara<sup>a</sup>

<sup>a</sup>*New York University, USA*

<sup>b</sup>*Institut Pasteur, France*

<sup>c</sup>*Harvard Medical School, USA*

<sup>d</sup>*Information Technology University, Pakistan*

---

## Abstract

Dengue virus causes over 96 million cases worldwide per year and is expanding rapidly in geographic range, especially in urban areas. Containment activities are an essential part of reducing the public health burden caused by dengue, but systematic evidence on the comparative efficacy of activities from the field is lacking. To our knowledge, the effect of containment activities on local (sub-city) scale disease dynamics has never been systematically characterized using empirical containment and case data. We combine data from a comprehensive dengue containment monitoring system with confirmed dengue case data from the local government hospitals to estimate the efficacy of seven common containment activities in two urban areas in Pakistan. We use a modified version of the time series Suspected Infected Recovered framework to estimate how the reproductive number,  $R_0$ , of the outbreak changed in relation to deployment of each containment activity. We also estimate the spatial dependence of cases based on deployment of each containment activity. Both analyses suggest that activities aimed at the adult phase of the mosquito lifecycle have the highest efficacy, with fogging having the largest quantifiable effect in reducing cases immediately after deployment. In examining the efficacy of containment activities contemporaneously deployed in the same locations, results here can guide recommendations for future deployment of resources during dengue outbreaks in urban settings.

*Keywords:* Dengue, containment, spatial statistics, timeseries

---

## 1. Introduction

Dengue is a global threat; rapidly spreading with more than one half of the world's population at risk for infection [1, 2]. Dengue virus is the most ubiquitous human arbovirus. It is transmitted primarily by *Aedes aegypti* mosquitoes, a vector which also transmits several other global threats including Zika, chikungunya and yellow fever [3]. Today, severe dengue is a leading cause of hospitalization and death among children and adults in urban areas in Asia, and Central and South America [4]. Dengue disproportionately affects urban areas in developing countries, which often have limited resources for containment and intervention activities [5, 6].

To date, the most common approach to reducing the burden of dengue is through prevention and containment of the vector population [7, 8]. Containment activities focused on vector control broadly fall into three categories: (i) activities targeted at reducing mosquito breeding sites (source reduction); (ii) activities targeted at the larval stage of the vector; and (iii) activities targeted at the adult stage of the vector [9]. While recent work has advanced efforts such as vaccines, genetically modified mosquitoes and Wolbachia-infected mosquitoes [10], these interventions are generally seen as a complement to containment activities [11], and may be prohibitively costly for many countries [12].

Despite the widespread use of containment activities, costing millions of dollars each year, the evidence base of how these activities reduce dengue risk is very limited. Existing research has largely focused on small controlled trials that estimate the effect of a containment activity by comparing treated and untreated populations [13, 14, 15, 16, 17]. Given the systematized nature of such studies, they generally focus on a small number of containment activities in a local, controlled environment; therefore the results may not be directly applicable to real-world settings, where external factors may impact the efficacy of the containment activities [18]. Further, nearly all efforts to quantify the effect of activities on vector control use markers of vector presence (e.g., household/container indices, Breteau indices) as the main outcome of measure, and do not incorporate disease incidence directly [19]. However, the link between vector measurements and dengue risk is poorly understood and a recent systematic review found little evidence of entomological indices such as the Breteau index being statistically associated with risks of dengue transmission [20, 21].

Here, we harness data from a novel containment monitoring system in

38 two cities in Pakistan which has produced data on millions of instances of  
39 seven different types of containment activities, each linked with precise geo-  
40 location information. In parallel, there is detailed geo-location information on  
41 when and where dengue cases occurred in the cities. This provides a unique  
42 opportunity to estimate the impact of the different containment activities on  
43 the spatial distribution of cases, which we do using two statistical frameworks.

44 This study, as far as we are aware, considers the largest number of  
45 dengue containment activity types and instances alongside real field case  
46 data. Though the application and results are derived for dengue fever, this  
47 approach and findings can be informative for containment activity deploy-  
48 ment for other arboviruses. Broadly, the results provide insight which can  
49 be used to help shape increasingly important decisions for resource alloca-  
50 tion in Pakistan and other countries at risk of dengue and other vector-borne  
51 diseases.

## 52 **2. Results**

53 To quantify the impact of containment activities on disease incidence, we  
54 use data on 10,888 confirmed geocoded dengue cases reported in the cities  
55 of Rawalpindi (N=7,890 between January 1, 2014 and December 31, 2017,  
56 Fig. S3 and Fig. S5) and Lahore (N=2,998 between January 1, 2012 and  
57 December 31, 2017, Fig. S2 and Fig. S4). After a major dengue outbreak  
58 in 2011, the city of Lahore experienced two mild outbreaks in 2013 and 2016  
59 while Rawalpindi has experienced outbreaks in each year since 2014. In  
60 addition, the date and precise location of 3,977,159 containment activities  
61 was recorded from the two locations (1,610,941 between January 1, 2014  
62 and December 31, 2017 from Rawalpindi and 2,366,218 between January 1,  
63 2012 and December 31, 2017 from Lahore) (Fig. S4, Fig. S5, [Methods](#),  
64 Supplementary Text and Table S1).

### 65 *2.1. Spatial Signature of Containment Activities*

66 To understand the spatial effect of containment activities, we adapt an  
67 approach previously used to assess dengue spatial dependence at small spa-  
68 tial levels [22, 23]. The spatial dependence metric,  $\tau$ , quantifies how the  
69 location and time of a case relates to the location and time of other cases.  
70 Specifically,  $\tau_i(d_1, d_2, t_1, t_2)$  is the relative probability of a case being reported  
71 in the distance window between  $d_1$  and  $d_2$ , for cases  $i$ , within 30 days ( $t_2 - t_1$ ,  
72 where  $t_1$  is the day when the case  $i$  developed first symptoms) compared to

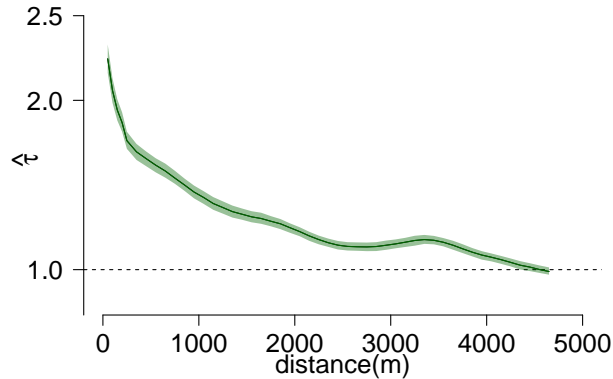

Figure 1: Spatial dependence of cases occurring within 30 days (cases from Lahore and Rawalpindi). The spatial window of the analysis ( $d_2 - d_1$ ) is maintained at 500 m when  $d_2$  is greater than 500 m, and observations are made by sliding the window at intervals of 100 m. For  $d_2$  less than 500 m,  $d_1$  is equal to zero and observations are made by increasing  $d_2$  at intervals of 100 m. Spatial dependence estimates are plotted at midpoint of the spatial window. The time window  $t_2 - t_1$  is set to 30 days. 95% CI from bootstrapping 100 replications is shown as green shaded area around estimate.

73 the expected probability of a case if there is no spatial dependence (the case  
74 clustering process is independent of space and time). Importantly, both the  
75 numerator and denominator of this metric are dependent on the spatiotem-  
76 poral distribution of cases appearing in the same area and time-window,  
77 therefore controlling for exogenous heterogeneities that could create spatial  
78 or temporal clustering (e.g., variation in population density, hospital and  
79 healthcare use and reporting rates, and dengue seasonality). All details are  
80 explained in [Methods](#) and follow previous work [22].

81 We first calculate the spatial dependence between cases overall, and then  
82 specifically for cases in each of Rawalpindi and Lahore ([Methods](#)). Overall,  
83 when considering combined patients from both cities, we observe a 2.25 times  
84 (95% CI 2.16-2.33) increased probability of observing a case occurring within  
85 50 m ( $d_1=0$  m and  $d_2=100$  m) radius and within 30 days of an index case,  
86 relative to the probability of a case occurring if clustering is independent in  
87 space and time, highlighting a strong spatial dependence between cases (Fig.  
88 1). This falls to 1.37 (95% CI 1.33-1.40) at a distance of 1.25 km ( $d_1=1$  km  
89 and  $d_2=1.5$  km) and 1.0 (95% CI 0.98-1.02) at a distance of 4.55 km ( $d_1=4.3$   
90 km and  $d_2=4.8$  km). When calculating spatial dependence separately for  
91 cases in each city, we observed a 2.21 times (95% CI 2.14-2.28) and 1.46

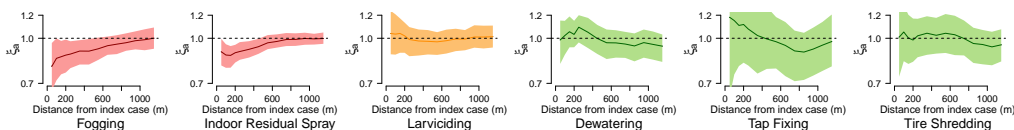

Figure 2: Variation in the effect of containment activity,  $\xi_{act}$ , versus the distance (in meters) from index cases using combined data from Rawalpindi and Lahore. Values of  $\xi_{act}$  are calculated using control and containment cases which appear in an  $m=1000$  m radius of each other. The spatial window of the analysis ( $d_2 - d_1$ ) is maintained at 500 m when  $d_2$  is greater than 500 m, and observations are made by sliding the window at intervals of 100 m. For  $d_2$  less than 500 m,  $d_1$  is equal to zero and observations are made by increasing  $d_2$  at intervals of 100 m. Spatial dependence estimates are plotted at midpoint of the spatial window. Values below 1 show a lower probability of new cases appearing around a case in proximity of a containment activity, compared to a control case. The time window  $t_2 - t_1$  is set to 30 days. 95% CI from bootstrapping 100 replications are shown as shaded areas around estimates. Activities targeted at adult stage of mosquito are shaded red, activities targeted at larval stage shaded orange, and activities targeted at source reduction are shaded green.

92 times (95% CI 1.29-1.59) increased probability of observing a case occurring  
 93 within 50 m ( $d_1=0$  m and  $d_2=100$  m) radius and within 30 days of an index  
 94 case (Fig. S6) in Rawalpindi and Lahore, respectively. The lower level of  
 95 spatial dependence in Lahore, as compared to Rawalpindi, suggests variation  
 96 in spatial dependence of cases, across different locations and times, should  
 97 be accounted for when studying the effect of containment activities.

98 We then study the result of different containment activities on the spatial  
 99 dependence between cases. Of the 9,268 geo-tagged cases in Rawalpindi and  
 100 Lahore between 2014 and 2017, 531 were assigned IRS, followed by larviciding  
 101 ( $n=275$ ) and fogging ( $n=162$ ) (Table S2). A total of 742 cases had multiple  
 102 containment activities in their spatio-temporal proximity and hence were  
 103 not used as index cases in the study. As underlying spatial dependence may  
 104 differ by different areas in the city or at different times during an epidemic  
 105 season, for each case where a containment activity was performed, we identify  
 106 a matched control where no activity occurred. Matched-controls occurred  
 107 within 30 days and 1000 m of the containment-case but which were not in  
 108 immediate vicinity of any containment activities. We define  $\xi_a(d_1, d_2)$ , as the  
 109 ratio of the spatial dependence in distance window  $d_1$  and  $d_2$ , as measured  
 110 through  $\tau$ , for cases which were in proximity of containment activity  $a$ , to  
 111 the same measure for the matched control. Values of  $\xi_a$  below 1 signify that

112 the relative probability of new cases appearing around a case which was in  
 113 proximity of a containment activity is lower compared to that of a control  
 114 case, after adjusting for underlying clustering in space and time, which is  
 115 consistent with a positive impact from the containment activity. Values of  
 116  $\xi_a$  around 1 indicate no impact of the activity.

117 We calculate the  $\xi_a$  values for each containment activity,  $a$ , using com-  
 118 bined data from both cities and for each city separately (Fig. 2, Fig. S7 and  
 119 Fig. S8). When considering combined data, we find a consistent reduction in  
 120 probability of new dengue cases in proximity of indoor residual spray (IRS)  
 121 and fogging (Fig. 2). There was a 0.9 reduced probability of a case occurring  
 122 within 50 m ( $d_1=0$  m and  $d_2=100$  m) and in the next 30 days of cases for  
 123 which IRS occurred immediately after and in the immediate vicinity (95%  
 124 CI: 0.81-0.99) (details in Methods). For fogging, this value was 0.80 (95%  
 125 CI: 0.66-0.96). By 750 m ( $d_1=500$  m and  $d_2=1000$  m) for IRS and 1050 m  
 126 ( $d_1=800$  m and  $d_2=1300$  m) for fogging, there was no difference ( $\xi_a=0.99$ ) in  
 127 probability of new cases around the containment cases and the controls (Ta-  
 128 ble S3). In contrast to fogging and IRS, there was no consistent reduction in  
 129 probability of new cases in proximity of any other containment activity (Fig.  
 130 2). This lack of effect is most clearly visible for larviciding which had the  
 131 most number of cases amongst activities which had no effect ( $n=275$ ). Due  
 132 to the low number of cases in proximity of tap fixing ( $n=25$ ), the resulting  
 133 plot for this activity indicate structural uncertainty and are not interpretable.  
 134 Findings were consistent when we varied the maximum distance of matched  
 135 controls (Fig. S9) and when considering cities separately (Fig. S7, Fig. S8  
 136 and Table S2).

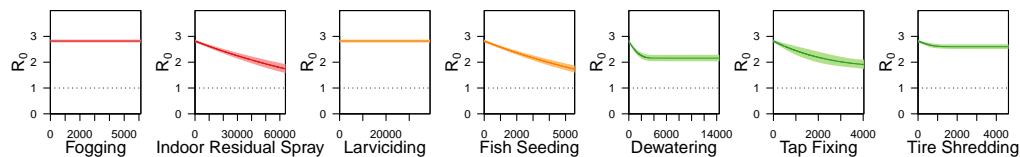

Figure 3: Variation in reproductive number ( $R_0$ ) of dengue, with variation in instances of containment activity, estimated from the model trained using data from ( $N=10$  spatial units) in Lahore between 2012 and 2017, and ( $N=14$  spatial units) in Rawalpindi between 2014 and 2017. X-axis represents the total number of containment activities performed, in a spatial unit, in a lagged time step and any residual effect from previous weeks.

137 *2.2. Impact of Containment Activities on  $R_0$*

138 To understand the effect of containment activities on the transmission  
139 potential of the outbreak and cases over time, we fit a Time Series Suscep-  
140 tible Infected Recovered (TSIR) model for sub-city spatial units from both  
141 cities ([Methods](#)) using the adjusted reported cases. Additionally, we create  
142 separate TSIR models for each city (Supplementary Text).

143 This modeling approach is useful as it allows us to account for envi-  
144 ronmental drivers, which are very pertinent in dengue epidemiology, and it  
145 assesses transmission potential through a standardized metric,  $R_0$ . In both  
146 Lahore and Rawalpindi, we observe high dengue activity during the post  
147 monsoon months, September-November, which highlights the importance of  
148 climate in the reproduction of dengue vector (Fig. S2 and Fig. S3). Given  
149 that nearly half of dengue cases are asymptomatic and given that our dataset  
150 primarily comprises of data from public hospitals, we adjust the reported  
151 cases for under-reporting ([Methods](#) and Supplementary Text) [1]. We also  
152 assessed sensitivity of results based on this reporting rate; showing no changes  
153 in the overall results (Fig. S14).

154 Each city is divided into spatial units ( $N=10$  for Lahore and  $N=14$  for  
155 Rawalpindi), based on administrative boundaries to model localized dengue  
156 transmission. We included containment activities, environmental data (tem-  
157 perature and rainfall), and population density as part of the model to identify  
158 the effect of each of these parameters. Appropriate delays, to account for vec-  
159 tor life cycle and transmission of virus from vector to human were added, and  
160 the residual effect of containment activities was accounted for, to model re-  
161 alistic transmission of dengue accurately infer the effect of each parameter  
162 (Supplementary Text). To access the utility of containment data, we train  
163 additional variants of the TSIR model using only environmental parameters  
164 and population density.

165 The model trained on data from spatial units from both cities, using only  
166 environmental parameters and population density, provided a good fit (ad-  
167 justed  $R^2 = 0.63$ ), and the addition of containment activities to the model  
168 improved the fit (adjusted  $R^2 = 0.65$ ). For the model trained only on data  
169 from spatial units in Rawalpindi, the addition of containment activities im-  
170 proved the adjusted  $R^2$  from 0.78 to 0.81. Similarly, for Lahore the model  
171 incorporating containment activities improved the adjusted  $R^2$  from 0.73 to  
172 0.76 (Akaike information criterion (AIC) values also reported in Table S7).

173 Overall, for the model trained on combined data, the reproductive num-  
174 ber was 2.82 (at mean temperature and precipitation values; 25.5 Celsius

175 and rainfall for 2 days during a 2 week period), if all containment activity  
176 coefficients are set to zero. For Lahore the  $R_0$  was 1.59 (at 26 Celsius and 2  
177 days of rainfall), and for Rawalpindi the  $R_0$  was 1.79 (at 24.9 Celsius and 2  
178 days of rainfall).

179 Our results illustrate varied relationships between an increase in the  
180 amount of containment activities and cases over time, for each activity as it  
181 was deployed in Lahore and Rawalpindi, and using  $R_0$  (Fig. 3, Fig. S12 and  
182 Fig. S13). We quantify the amount of a containment activity in instances,  
183 where an instance during a single time-step (2 weeks in our study) represents  
184 the sum of the number of activities performed during the time-step, and the  
185 residual effect of any activities performed in previous weeks (Supplementary  
186 Text). For example for fogging, which has no residual effect, an instance at  
187 time  $t$  represents only the number of activities performed in a spatial unit  
188 at  $t$ . In contrast, for IRS which has a residual effect, instances at time  $t$   
189 represent the sum of the number of IRS activities performed at time  $t$  and  
190 the residual effect of IRS activities performed in the previous six time-steps  
191 (the residual effect of IRS is three months).

192 Of the adulticides, we find an increase in IRS to be related to a decrease  
193 in  $R_0$  of dengue in both Lahore and Rawalpindi, as well as when data from  
194 both cities is modelled as part of a single model. Specifically, additional  
195 deployment of approximately 4,800 IRS activities in a spatial unit was related  
196 to a 0.1 decrease in the  $R_0$  of dengue. In contrast, fogging was related  
197 to a decrease in the  $R_0$  of dengue only in Lahore. Among containment  
198 activities targeted at the larval stage of mosquitoes, larviciding showed no  
199 effect on  $R_0$  in either city or when data from both cities was trained together,  
200 while fish seeding was only related to a decrease in  $R_0$  when data from both  
201 cities was trained in a single model. Among source reduction activities, tap  
202 fixing was related to a decrease in  $R_0$  in Lahore and in the model with  
203 combined data from both cities. Tire shredding was related to a decrease  
204 in  $R_0$  in Rawalpindi, and when analyzing combined data from both cities,  
205 but the effect of this activity was not statistically significant in Rawalpindi.  
206 Dewatering was only related to a decrease in  $R_0$  when data from both cities  
207 was trained in a single model. Results across all models are summarized in  
208 Table S4.



### 209 3. Discussion

210 Data from the dengue containment activity monitoring system deployed  
211 in the Punjab province, Pakistan in 2012 was used; which, to our knowledge,  
212 monitors the largest number and types of containment activities. The system  
213 captured millions of containment activity events over a seven-year period  
214 (Table S1), each event linked to precise geo-coordinates. Combined with  
215 geo-location of patients, this allowed us to systematically examine the effect  
216 of multiple containment activities on sub-city scale disease dynamics, which  
217 has never before been characterized using empirical activity and case data.

218 We examined the relationship between deployed instances of each contain-  
219 ment activity type and the spatial dependence of geo-located dengue cases  
220 in their proximity, in the cities of Rawalpindi and Lahore between 2014 and  
221 2017. This method allows generation of unbiased estimates in the midst of  
222 exogeneous heterogeneities that could create spatial or temporal clustering  
223 (e.g., variation in population density, hospital and healthcare use and report-  
224 ing rates, and dengue seasonality). The result is quantification of both the  
225 maximum reduction in dengue transmission in the vicinity of a particular  
226 type of activity, as well as the maximum distance at which this reduction in  
227 dengue transmission is evident. Notably, the method and results provides  
228 novel empirical results insights into the comparative efficacy of fogging and  
229 indoor residual spray using real case and containment activity data.

230 The time series modelling of dengue cases in Lahore and Rawalpindi en-  
231 abled us to assess the relation between the  $R_0$  of dengue and amount of  
232 containment activities, as deployed. Results from this approach are based  
233 on empirical field data, consider multiple interventions and use a precise and  
234 standardized measure of efficacy ( $R_0$ ) in contrast to studies based on sim-  
235 ulated data and models, or using proxy measures for dengue transmission  
236 [19]. The results show that training a separate model for spatial units in  
237 each city provides a better fit to data and hence results from models trained  
238 for individual cities get precedence over the model trained on combined data.

239 The spatial dependence of dengue cases reported here is consistent with  
240 that reported in previous work using dengue case data from Bangkok. The  
241 spatial dependence at 200 m, presented in [22] is 1.82 (95% CI: 1.45-2.16) is  
242 comparable to 1.87 (95% CI: 1.81-1.93) observed in the two cities in Pakistan  
243 in our study. Further, the values of 1.83 and 1.45 observed in Rawalpindi and  
244 Lahore respectively also lies within the confidence interval. Results from the  
245 spatial signature analysis show that application of IRS and fogging spray,

246 in the vicinity of a dengue case, result in reduction of the generation of  
247 new cases by 10% and 20% respectively. Additionally, IRS and fogging are  
248 shown to be effective ( $\xi_a$  below 1) up to a distance of 750 m and 1050 m  
249 respectively. Similar trends are observed based on the results of time series  
250 modelling of containment activities. Increases in IRS and fogging are re-  
251 lated to decreases in the reproductive number of dengue in Lahore, though  
252 results from Rawalpindi specific model only show a statistically significant  
253 effect from IRS. This could be due to the fact that TSIR models assume  
254 that activities and cases are uniformly distributed in each spatial unit con-  
255 sidered. If the assumption is violated and activities are not performed in the  
256 direct vicinity of cases, then the resulting effect from the model may not be  
257 completely accurate [24].

258 Results from both the spatial dependence method and timeseries mod-  
259 elling did not find larviciding to be effective. These results are consistent  
260 with a recent systematic review, which found Temephos (a chemical used  
261 in larviciding) to be only effective in reducing entomological indicators, but  
262 found no evidence of its association with reduction in disease transmission.  
263 At the same time, the results highlight that while containment activities can  
264 be effective under laboratory conditions, the effectiveness does not translate  
265 exactly in the field in reducing dengue transmission. This signifies the utility  
266 of studies such as this which examine effectiveness of containment activities  
267 using real case data. For example, there is conflicting evidence regarding  
268 the effectiveness of fish seeding in the literature [13, 25]. Our time series  
269 method did not find fish seeding to be effective in either city, and due to a  
270 minimal number of cases which were adjacent to only fish seeding activities,  
271 no inference about the effectiveness of fish seeding could be made from the  
272 spatial dependence method.

273 Among source reduction containment activities, we find no activity to  
274 be effective using the spatial dependence method. Using the TSIR model,  
275 we find an increase in tap fixing in Lahore and increase in dewatering in  
276 Rawalpindi to be associated with a decrease in the reproductive number of  
277 dengue.

278 Quantitatively, our results corroborate existing knowledge about the role  
279 of rainfall and temperature in dengue transmission by showing increases in  
280  $R_0$  with increases in temperature and number of rainfall days [26, 27] (Sup-  
281 plementary Text). We also find an increase in population density is related  
282 to an increase in  $R_0$ , when considering data from both cities separately (Sup-  
283 plementary Text).

284 It should be noted that results from this study are only relevant to the  
285 spatial dependence of cases or relationship between containment activity de-  
286 ployment and  $R_0$  after dengue cases have started to appear. Results from  
287 the study do not explain the effect of a containment activity on the overall  
288 dengue burden, or on delaying or preventing the appearance of first cases.  
289 A separate, and longitudinal analysis would be required to evaluate the pre-  
290 ventive effectiveness of each containment activity. As well, as with any study  
291 based on human reported data, there could be a chance of sampling bias in  
292 the containment activity reports. Such a bias would have to have a system-  
293 atic spatial or temporal dependence in order to impact results; thus we deem  
294 the assumption that such a bias would not affect the results fair. Further,  
295 while we consistently observe a short-term positive impact of IRS on dengue  
296 incidence, we were unable to assess the longer-term impact of the contain-  
297 ment activities and we cannot rule out these containment activities simply  
298 delay infection to future time points [28].

299 In conclusion, results of this study regarding the relationship of different  
300 containment measures with the spatial dependence of dengue cases or the  $R_0$ ,  
301 provide specific insight regarding dengue in urban settings. More broadly,  
302 these results and the models and methods used to derive them – are relevant  
303 to a growing number of global health concerns related to the *Aedes aegypti*  
304 mosquito, including the Zika virus and chikungunya, which are also known to  
305 particularly impact urban areas. Further, the methods presented in the work  
306 lay groundwork for future studies aimed at studying the effect of containment  
307 from observational data collected from the field.

## 308 4. Methods

### 309 4.1. Containment Activities Data

310 Modern technology was applied by the Punjab Information Technology  
311 Board to track containment activities carried out by the Punjab Health De-  
312 partment. Mobile phones were distributed to health care workers to record  
313 their activities since 2012 using a mobile application (Supplementary Text  
314 and Fig. S1). Government workers were asked to take a picture before and  
315 after performing the containment activity as a verifiable proof that the ac-  
316 tivity had been performed (Supplementary Text). Global positioning system  
317 (GPS) coordinates of the location, time stamp, and pictures of the performed  
318 activity were automatically submitted to a centralized server where they were  
319 monitored. Data on dengue containment activities for the period January 1,

320 2012 to December 31, 2017 was received. This consisted of 7,281,932 con-  
321 tainment records, each including the name of the containment activity, a  
322 time stamp of when the activity was performed and the GPS coordinates  
323 for the location of where it was performed. After excluding those activities  
324 performed outside the boundaries of the two cities, we were left with a total  
325 of 2,366,218 containment activity instances in Lahore between January 1,  
326 2012 and December 31, 2017, and 1,610,941 activity instances performed in  
327 Rawalpindi between January 1, 2014 and December 31, 2017. For the TSIR  
328 model, we used the GPS coordinates to map each containment activity data  
329 point to a spatial unit.

#### 330 4.2. *Epidemiological data*

331 Data regarding confirmed dengue cases, for the same time period as the  
332 containment activities, was retrieved from the Government of Punjabs cen-  
333 tralized patient portal system. Precisely geo-tagged information linked to  
334 each case was available starting in 2014 (spatial unit level data was available  
335 from 2012-2014 for Lahore) (Supplementary Text). A total of 2,998 cases  
336 were reported in Lahore between January 1, 2012 and December 31, 2017.  
337 In Rawalpindi a total of 7,890 confirmed dengue cases were reported and  
338 geo-tagged between January 1, 2014 and December 31, 2017.

#### 339 4.3. *Environmental Data*

340 City-wide daily mean temperature and mean precipitation estimates, for  
341 both cities, were obtained from the Pakistan Meteorological Department for  
342 time series method ([www.pmd.gov.pk](http://www.pmd.gov.pk) accessed August 27, 2018). As pre-  
343 viously shown these climate factors directly affect mosquito survival, repro-  
344 duction, and development and thus their abundance.

#### 345 4.4. *Spatial Dependence of Cases*

346 First, to characterize the spatial dependence of cases we compute the  
347 probability of a case occurring between times  $t_1$  and  $t_2$ , and within distance  
348 range  $d_1$  and  $d_2$  of a given case versus the expected probability if the clus-  
349 tering processes were independent in space and time:

$$\tau_i(d_1, d_2, t_1, t_2) = \frac{Pr(\Omega_i(d_1, d_2, t_1, t_2))}{Pr(\Omega_i(d_1, d_2, \cdot, \cdot))Pr(\Omega_i(\cdot, \cdot, t_1, t_2))} \quad (1)$$

350 where  $\Omega_i(d_1, d_2, t_1, t_2)$  is the set of cases between  $d_1$  and  $d_2$  (in meters) and  
351 temporal window of  $t_1$  and  $t_2$  (in days) of case  $i$ ;  $\Omega_i(\cdot, \cdot, t_1, t_2)$  is the set of cases

352 in temporal window  $t_1$  to  $t_2$  of case  $i$  independent of space, and  $\Omega_i(d_1, d_2, \cdot, \cdot)$   
353 the set of cases within spatial window  $d_1$  and  $d_2$  of case  $i$ , independent of  
354 time. For our analysis, we use a fixed time window of 30 days:  $t_1$  is selected  
355 as the day when the patient experienced first symptoms of dengue virus, and  
356  $t_2 = t_1 + 30$ . This time window is chosen to ensure that cases considered are  
357 from the same transmission chain, though we perform sensitivity analysis  
358 using additional time windows (Fig. S10). Dependence is then observed  
359 across variation in the distance window.

360 Then, the overall spatial dependence of new cases appearing around cases  
361 labelled  $s$  (labelling is defined in the next subsection) is estimated as:

$$\hat{\tau}_s(d_1, d_2, t_1, t_2) = \frac{(\sum_{i=1}^N |\Omega_i(d_1, d_2, t_1, t_2)|z_i) \cdot (\sum_{i=1}^N |\Omega_i(\cdot, \cdot, \cdot, \cdot)|z_i)}{(\sum_{i=1}^N |\Omega_i(d_1, d_2, \cdot, \cdot)|z_i) \cdot (\sum_{i=1}^N |\Omega_i(\cdot, \cdot, t_1, t_2)|z_i)} \quad (2)$$

362 where  $z_i$  is 1 if the case is labelled  $s$ ,  $N$  is the total number of cases in the  
363 dataset regardless of their label, and  $\Omega_i(\cdot, \cdot, \cdot, \cdot)$  is the set of all cases in the  
364 dataset.

#### 365 4.5. Spatial Signature of Containment Activities

366 To identify the impact of containment activities on the spatial dependence  
367 of dengue cases (the “spatial signature” of an activity) we first label all  
368 cases in the dataset as either a “containment” or a “control”. A case is  
369 labelled as  $s = a$  if only the containment  $a$  was performed in a 20 meter  
370 radius and time window of the past 30 days of the case before the first  
371 symptom appeared. Only cases for which a single containment activity was  
372 performed in the surrounding area are included in the analysis, to ensure  
373 only the effect of a single type of containment activity is being measured. A  
374 case is labelled a control,  $s = c$ , if no containment activity was performed in  
375 a 20 meter radius and time window of the past 30 days of the case before  
376 the first symptom appeared. The *tau* metric measures clustering dynamics,  
377 however there are factors such as population variation, reporting biases and  
378 availability of vegetation and water for growth of vector, can also play a role  
379 in variation of the number of cases that would be expected in a given location  
380 and time. Thus, to compare clustering while controlling for such factors, we  
381 compare clustering around cases that have a similar epidemiological context.  
382 For a given set of containment cases labelled  $a$ , we select a subset of cases,  
383  $a'$ , such that each case in  $a'$  has a matching control case. A matching control

384 case is defined as a control case which is within a radius of  $m$  meters, and  
385 was reported within 30 days of the containment case. We assess how values  
386 of  $m$  of 500, 1,000 and 2,000 (Fig. 2 and Fig. S9) impact the results. For  
387 each containment case  $a'$ , we randomly select a matching control case and  
388 represent the set of matching control cases as  $c'_a$ . The spatial signature of  
389 containment activity  $a$ ,  $\xi_a$ , is then calculated as:

$$\xi_a = \frac{\hat{\tau}_{a'}}{\hat{\tau}_{c'_a}} \quad (3)$$

#### 390 4.6. Impact of Containment Activities on $R_0$

391 We model the incidence of dengue using a time-series susceptibleinfect-  
392 edrecovered (TSIR) model of viral incidence previously used to reconstruct  
393 dengue dynamics in Asia (Supplementary Text) [29, 30]. The city of La-  
394 hore is divided in ( $n=10$ ) and the city of Rawalpindi in ( $n=14$ ) spatial units,  
395 and localized transmission of dengue is modelled at each spatial unit. The  
396 reported cases, in each spatial unit, are first reconstructed to account for  
397 under-reporting. The reported number of cases,  $I_i^{(r)}(t)$ , are first smoothed,  
398 then multiplied with the inverse of the reporting rate  $rr$ , and the product  
399 is used as the mean of Poisson distribution (Supplementary Text, and Table  
400 S5 and S6). The number of infected individuals,  $I_i(t)$ , are selected at each  
401 time step from the distribution. This reconstruction methodology, used in  
402 previous infectious disease modeling work [31], gives the advantage of captur-  
403 ing tails of the epidemic curve in a realistic, continuous manner. Our model  
404 incorporates environmental parameters in the transmission rate to account  
405 for variation in vector population density. We use two weeks as the time step  
406 in our study, consistent with the generation interval and previous studies  
407 which model the transmission of dengue [32, 30] (Supplementary Text). The  
408 general TSIR model is defined via the following equations:

$$I_i(t+1) = \beta_i(t) \frac{S_i(t)}{N_i(t)} I_i^{\alpha_i}(t) \epsilon \quad (4)$$

409

$$S_i(t) = S_i(t-1) - I_i(t) + \rho N_i(t-1) - \phi S_i(t-1) \quad (5)$$

410 where  $I_i(t)$ ,  $S_i(t)$  and  $N_i(t)$  are the infected, susceptible and total population  
411 during time step  $t$  in spatial unit  $i$ ,  $\rho$  is the bi-weekly birth rate,  $\phi$  is the bi-  
412 weekly death rate,  $\alpha_i$  is the mixing coefficient in spatial unit  $i$ , and  $\beta_i(t)$  is the

413 transmission coefficient during time step  $t$ . The error term  $\epsilon$  is assumed to  
414 be an independent and identically log-normally distributed random variable.

415 We endogenize containment activities in the transmission coefficient  $\beta_i(t)$ .  
416 This decision reflects the fact that containment activities reduce the contact  
417 rate between humans and mosquitoes, which results in a reduction of the  
418 transmission rates from human to mosquito to human [33]. The transmission  
419 coefficient  $\beta$  for equation 4 is parameterized as:

$$\log(\beta_i(t)) = \sum_a \theta_a C_{i,a}(t - l_a) + \sum_j \theta_j E_j(t - l_j) + \theta_p D_i(t) \quad (6)$$

420 where  $l_a$  and  $l_j$  are time steps containment activities  $a$  and environmental  
421 parameters  $j$  were lagged respectively (Supplementary Text).  $C_{i,a}(t - l_a)$   
422 is the number of times per squared kilometer containment activity  $a$  was  
423 performed in spatial unit  $i$  during week  $(t - l_a)$ .  $E_j(t - l_j)$  is the value of  
424 environmental parameter  $j$  during week  $(t - l_j)$ .  $D_i(t)$  is the population  
425 density in spatial unit  $i$ . The residual effect of each containment activity is  
426 added based on existing knowledge (see section Transmission cycle of dengue  
427 and timing and residual effect of containment activities in Supplementary  
428 Text).

429 To calculate the value of  $\beta_i(t)$ , the value of  $\beta$  for each town at each time  
430 step, a single model is used to find the best fit for parameters:  $\theta_a$ ,  $\theta_j$ ,  $\theta_p$ ,  
431 based on the number of each containment activity and environmental pa-  
432 rameters as well as all non-zero cases data point in each town,  $i$ , at every  
433 time step (equation 6). We use Shape constrained additive model (SCAM)  
434 to fit this relationship. Shape constrained additive models are an extension  
435 of generalized additive models (GAMs) which provide the advantage of using  
436 existing knowledge about the relationship of the response variable with the  
437 explanatory variables [34, 35]. This prevents noise from being included in the  
438 shape of splines from the GAM. Containment activities are modeled as mono-  
439 tonically decreasing splines while environmental parameters and population  
440 density are modeled as monotonically increasing splines. The smoothing pa-  
441 rameters are estimated using maximum likelihood. Finally, using estimates  
442 of  $\theta_a$ ,  $\theta_j$ , and  $\theta_p$  from the SCAM model and equation 6 and 7, we identify the  
443 variation in  $R_0$  (reproductive number of dengue) by variation in the amount  
444 of each containment activity. The  $R_0$  is calculated by the following equation:

$$R_{0_i}(t) = \frac{\beta_i(t)}{\gamma} \quad (7)$$

445

446 where,  $\gamma$  is the recovery rate and is equal to 1 time step in our study, given  
447 the fact that infected patients are immediately admitted in the hospital and  
448 removed from the infected population. The reproductive number can be  
449 defined as the number of secondary infections a primary infection can cause  
450 over the course of its infectious period [36]. If  $R_0$  is greater than 1, then the  
451 disease will spread exponentially, while an  $R_0$  below 1 means that the disease  
452 will not spread.

- 453 [1] S. Bhatt, P. W. Gething, O. J. Brady, J. P. Messina, A. W. Farlow,  
454 C. L. Moyes, J. M. Drake, J. S. Brownstein, A. G. Hoen, O. Sankoh,  
455 M. F. Myers, D. B. George, T. Jaenisch, G. R. Wint, C. P. Simmons,  
456 T. W. Scott, J. J. Farrar, S. I. Hay, The global distribution and burden  
457 of dengue, *Nature* 496 (2013) 504–7.
- 458 [2] M. G. Guzman, E. Harris, Dengue, *The Lancet* 385 (2015) 453–465.
- 459 [3] C. P. Simmons, J. J. Farrar, N. van Vinh Chau, B. Wills, Dengue, *New*  
460 *England Journal of Medicine* 366 (2012) 1423–1432.
- 461 [4] C. H. Calisher, Persistent emergence of dengue, *Emerging infectious*  
462 *diseases* 11 (2005) 738.
- 463 [5] S. B. Halstead, Selective primary health care: strategies for control of  
464 disease in the developing world. xi. dengue, *Rev Infect Dis* 6 (1984)  
465 251–64.
- 466 [6] O. Horstick, S. Runge-Ranzinger, M. B. Nathan, A. Kroeger, Dengue  
467 vector-control services: how do they work? a systematic literature re-  
468 view and country case studies, *Trans R Soc Trop Med Hyg* 104 (2010)  
469 379–86.
- 470 [7] D. J. Gubler, Epidemic dengue/dengue hemorrhagic fever as a public  
471 health, social and economic problem in the 21st century, *Trends in*  
472 *microbiology* 10 (2002) 100–103.
- 473 [8] J. Hemingway, B. J. Beaty, M. Rowland, T. W. Scott, B. L. Sharp, The  
474 innovative vector control consortium: improved control of mosquito-  
475 borne diseases, *Trends Parasitol* 22 (2006) 308–12.



- 476 [9] W. H. Organization, Regional office for south east asia: Comprehensive  
477 guidelines for prevention and control of dengue and dengue hemorrhagic  
478 fever: Revised and expanded edition, New Delhi, India 14 (2011) 16.
- 479 [10] A. A. Hoffmann, B. L. Montgomery, J. Popovici, I. Iturbe-Ormaetxe,  
480 P. H. Johnson, F. Muzzi, M. Greenfield, M. Durkan, Y. S. Leong,  
481 Y. Dong, H. Cook, J. Axford, A. G. Callahan, N. Kenny, C. Omodei,  
482 E. A. McGraw, P. A. Ryan, S. A. Ritchie, M. Turelli, S. L. O'Neill,  
483 Successful establishment of wolbachia in aedes populations to suppress  
484 dengue transmission, *Nature* 476 (2011) 454–7.
- 485 [11] J. Reiner, R. C., N. Achee, R. Barrera, T. R. Burkot, D. D. Chadee, G. J.  
486 Devine, T. Endy, D. Gubler, J. Hombach, I. Kleinschmidt, A. Lenhart,  
487 S. W. Lindsay, I. Longini, M. Mondy, A. C. Morrison, T. A. Perkins,  
488 G. Vazquez-Prokopec, P. Reiter, S. A. Ritchie, D. L. Smith, D. Strick-  
489 man, T. W. Scott, Quantifying the epidemiological impact of vector  
490 control on dengue, *PLoS Negl Trop Dis* 10 (2016) e0004588.
- 491 [12] J. G. Schraiber, A. N. Kaczmarczyk, R. Kwok, M. Park, R. Silverstein,  
492 F. U. Rutaganira, T. Aggarwal, M. A. Schwemmer, C. L. Hom, R. K.  
493 Grosberg, et al., Constraints on the use of lifespan-shortening wolbachia  
494 to control dengue fever, *Journal of theoretical biology* 297 (2012) 26–32.
- 495 [13] V. M. Azevedo-Santos, J. R. Vitule, E. Garcia-Berthou, F. M. Pelicice,  
496 D. Simberloff, Misguided strategy for mosquito control, *Science* 351  
497 (2016) 675.
- 498 [14] Y. H. Bang, C. P. Pant, A field trial of abate larvicide for the control of  
499 aedes aegypti in bangkok, thailand, *Bull World Health Organ* 46 (1972)  
500 416–25.
- 501 [15] W. W. Han, A. Lazaro, P. J. McCall, L. George, S. Runge-Ranzinger,  
502 J. Toledo, R. Velayudhan, O. Horstick, Efficacy and community effec-  
503 tiveness of larvivorous fish for dengue vector control, *Trop Med Int*  
504 *Health* 20 (2015) 1239–1256.
- 505 [16] A. Kroeger, A. Lenhart, M. Ochoa, E. Villegas, M. Levy, N. Alexander,  
506 P. J. McCall, Effective control of dengue vectors with curtains and  
507 water container covers treated with insecticide in mexico and venezuela:  
508 cluster randomised trials, *BMJ* 332 (2006) 1247–52.

- 509 [17] V. C. Pinheiro, W. P. Tadei, Evaluation of the residual effect of temephos  
510 on *aedes aegypti* (diptera, culicidae) larvae in artificial containers in  
511 manaus, amazonas state, brazil, *Cad Saude Publica* 18 (2002) 1529–36.
- 512 [18] R. Reiner, S. Stoddard, G. Vazquez-Prokopec, H. Astete, T. A. Perkins,  
513 M. Sihuinchu, J. Stancil, D. Smith, T. Kochel, E. Halsey, et al., Es-  
514 timating the impact of city-wide *aedes aegypti* population control: An  
515 observational study in iquitos, peru, *bioRxiv* (2018) 265751.
- 516 [19] T. Erlanger, J. Keiser, J. Utzinger, Effect of dengue vector control  
517 interventions on entomological parameters in developing countries: a  
518 systematic review and metaanalysis, *Medical and veterinary entomology*  
519 22 (2008) 203–221.
- 520 [20] L. George, A. Lenhart, J. Toledo, A. Lazaro, W. W. Han, R. Velayudhan,  
521 S. Runge Ranzinger, O. Horstick, Community-effectiveness of temephos  
522 for dengue vector control: A systematic literature review, *PLoS Negl*  
523 *Trop Dis* 9 (2015) e0004006.
- 524 [21] L. R. Bowman, S. Runge-Ranzinger, P. McCall, Assessing the rela-  
525 tionship between vector indices and dengue transmission: a systematic  
526 review of the evidence, *PLoS neglected tropical diseases* 8 (2014) e2848.
- 527 [22] H. Salje, J. Lessler, T. P. Endy, F. C. Curriero, R. V. Gibbons,  
528 A. Nisalak, S. Nimmannitya, S. Kalayanarooj, R. G. Jarman, S. J.  
529 Thomas, et al., Revealing the microscale spatial signature of dengue  
530 transmission and immunity in an urban population, *Proceedings of the*  
531 *National Academy of Sciences* 109 (2012) 9535–9538.
- 532 [23] J. Lessler, H. Salje, M. K. Grabowski, D. A. Cummings, Measuring  
533 spatial dependence for infectious disease epidemiology, *PloS one* 11  
534 (2016) e0155249.
- 535 [24] C. J. E. Metcalf, V. Andreasen, O. N. Bjørnstad, K. Eames, W. J. Ed-  
536 munds, S. Funk, T. Hollingsworth, J. Lessler, C. Viboud, B. T. Grenfell,  
537 Seven challenges in modeling vaccine preventable diseases, *Epidemics*  
538 10 (2015) 11–15.
- 539 [25] S. N. Surendran, A. Kajatheepan, P. J. Jude, R. Ramasamy, Use of  
540 tilapia, *oreochromis mossambicus*, for the control of mosquito breed-

- 541 ing in water storage tanks in the jaffna district of sri lanka, *Tropical*  
542 *Medicine and Health* 36 (2008) 107–110.
- 543 [26] R. Bueno-Mari, R. Jimenez-Peydro, Global change and human vulner-  
544 ability to vector-borne diseases, *Front Physiol* 4 (2013) 158.
- 545 [27] L. Xu, L. C. Stige, K.-S. Chan, J. Zhou, J. Yang, S. Sang, M. Wang,  
546 Z. Yang, Z. Yan, T. Jiang, et al., Climate variation drives dengue dy-  
547 namics, *Proceedings of the National Academy of Sciences* 114 (2017)  
548 113–118.
- 549 [28] N. Ferguson, Challenges and opportunities in controlling mosquito-  
550 borne infections., *Nature* 559 (2018) 490–497.
- 551 [29] B. F. Finkenstdt, B. T. Grenfell, Time series modelling of childhood  
552 diseases: a dynamical systems approach, *Journal of the Royal Statistical*  
553 *Society: Series C (Applied Statistics)* 49 (2000) 187–205.
- 554 [30] M. U. Kraemer, T. A. Perkins, D. A. Cummings, R. Zakar, S. I. Hay,  
555 D. L. Smith, J. Reiner, R. C., Big city, small world: density, contact  
556 rates, and transmission of dengue across pakistan, *J R Soc Interface* 12  
557 (2015) 20150468.
- 558 [31] T. P. Van Boeckel, S. Takahashi, Q. Liao, W. Xing, S. Lai, V. Hsiao,  
559 F. Liu, Y. Zheng, Z. Chang, C. Yuan, et al., Hand, foot, and mouth dis-  
560 ease in china: critical community size and spatial vaccination strategies,  
561 *Scientific reports* 6 (2016) 25248.
- 562 [32] N. G. Reich, S. Shrestha, A. A. King, P. Rohani, J. Lessler, S. Kalayana-  
563 rooj, I.-K. Yoon, R. V. Gibbons, D. S. Burke, D. A. Cummings, Inter-  
564 actions between serotypes of dengue highlight epidemiological impact  
565 of cross-immunity, *Journal of The Royal Society Interface* 10 (2013)  
566 20130414.
- 567 [33] M. L. Ndeffo-Mbah, D. P. Durham, L. A. Skrip, E. O. Nsoesie, J. S.  
568 Brownstein, D. Fish, A. P. Galvani, Evaluating the effectiveness of  
569 localized control strategies to curtail chikungunya, *Sci Rep* 6 (2016)  
570 23997.
- 571 [34] N. Pya, S. N. Wood, Shape constrained additive models, *Statistics and*  
572 *Computing* 25 (2015) 543–559.

- 573 [35] S. N. Wood, Modelling and smoothing parameter estimation with mul-  
574 tiple quadratic penalties, *Journal of the Royal Statistical Society: Series*  
575 *B (Statistical Methodology)* 62 (2000) 413–428.
- 576 [36] C. Fraser, C. A. Donnelly, S. Cauchemez, W. P. Hanage, M. D.  
577 Van Kerkhove, T. D. Hollingsworth, J. Griffin, R. F. Baggaley, H. E.  
578 Jenkins, E. J. Lyons, T. Jombart, W. R. Hinsley, N. C. Grassly, F. Bal-  
579 loux, A. C. Ghani, N. M. Ferguson, A. Rambaut, O. G. Pybus, H. Lopez-  
580 Gatell, C. M. Alpuche-Aranda, I. B. Chapela, E. P. Zavala, D. M. Gue-  
581 vara, F. Checchi, E. Garcia, S. Hugonnet, C. Roth, W. H. O. R. P. A.  
582 Collaboration, Pandemic potential of a strain of influenza a (h1n1):  
583 early findings, *Science* 324 (2009) 1557–61.
